# Supplementary material for: Head-Mounted Displays for Upper Limb Stroke Rehabilitation: A Scoping Review
Source: MDPI journal article supplement (doi:10.3390/jcm12237444), 2023-11-30
Supplement: s1 [file s1]

## Head-mounted displays for upper limb stroke rehabilitation: a scoping review.

### PUBMED

(((((stroke[MeSH Terms]) OR (stroke[Title/Abstract])) OR (Cerebrovascular Accident[Title/Abstract])) OR (CVA[Title/Abstract])) OR (Hemiparesis[Title/Abstract])) OR (Hemiplegia[Title/Abstract])) AND (((((virtual reality[MeSH Terms]) OR (virtual reality[Title/Abstract])) OR (immersive virtual reality[Title/Abstract])) OR (Smart Glasses[MeSH Terms])) OR (Head Mounted Display[Title/Abstract]))) AND (((Upper Extremity[MeSH Terms]) OR (upper extremit\*[Title/Abstract])) OR (upper limb[Title/Abstract])) OR (arm[Title/Abstract]))

### EMBASE

'cerebrovascular disease':ab,kw,ti OR 'cerebrovascular accident':ab,kw,ti OR 'stroke patient':ab,kw,ti OR 'hemiparesis':ab,kw,ti OR 'hemiplegia':ab,kw,ti

AND

'virtual reality':ab,kw,ti OR 'head-mounted display':ab,kw,ti OR 'smart glasses':ab,kw,ti OR 'immersive virtual reality':ab,kw,ti OR 'virtual reality head mounted display':ab,kw,ti

AND

'upper limb':ab,kw,ti

### WEB of SCIENCE

(((((TS=(stroke)) OR TS=(Cerebrovascular Accident)) OR TS=(CVA)) OR TS=(Hemiparesis)) OR TS=(Hemiplegia)) OR TS=(Cerebrovascular Disease)

AND

((TS=(Virtual reality)) OR TS=(immersive virtual reality)) OR TS=(Smart Glasses)) OR TS=(Head Mounted Display)

AND

((TS=(upper extremit\*)) OR TS=(upper limb)) OR TS=(arm)

### SCIENCEDIRECT

(stroke OR cerebrovascular accident OR hemiparesis OR hemiplegia) AND (virtual reality OR head mounted display OR smart glasses) AND (upper limb OR upper extremity)
