# Supplementary material for: Head-Mounted Displays for Upper Limb Stroke Rehabilitation: A Scoping Review
Source: MDPI journal article supplement (doi:10.3390/jcm12237444), 2023-11-30
Supplement: s1 [file s1]

## Head-mounted displays for upper limb stroke rehabilitation: a scoping review.

| Abbreviation | Meaning                                     |
|--------------|---------------------------------------------|
| ADL          | Activities of Daily Living                  |
| ARAT         | Action Research Arm Test                    |
| AROM         | Active Range Of Motion                      |
| BBT          | Box and Block Test                          |
| BDNF         | Brain-Derived Neurotrophic Factor           |
| BI           | Barthel Index                               |
| CAVE         | Cave Automatic Virtual Environment          |
| CG           | Control Group                               |
| COT          | Conventional Occupational Therapy           |
| CT           | Conventional Therapy                        |
| EEG          | Electroencephalography                      |
| EMG          | Electromyography                            |
| EQ5D-L       | EuroQol 5 Dimensions-5 Levels               |
| F            | Females                                     |
| FIM          | Functional Independence Measure             |
| FMA-UE       | Fugl-Meyer Assessment Upper Extremity       |
| (f)MRI       | (functional) Magnetic Resonance Imaging     |
| HMD          | Head Mounted Display                        |
| ICF          | International Classification of Functioning |
| IVR          | Immersive Virtual Reality                   |
| M            | Males                                       |
| MAL          | Motor Activity Log                          |
| MAL-AOU      | Motor Activity Log - Amount Of Use          |
| MAL-QOM      | Motor Activity Log - Quality Of Movement    |
| MAS          | Modified Ashworth Scale                     |
| (M)BI        | (Modified) Barthel Index                    |
| MD           | Mean Difference                             |
| MFT          | Manual Function Test                        |
| MI           | Motricity Index                             |
| MoCA         | Montreal Cognitive Assessment               |
| NA           | Not Applicable                              |

|           |                                                                 |
|-----------|-----------------------------------------------------------------|
| NCCT      | Non-Controlled Clinical Trial                                   |
| NIVR      | Non-Immersive Virtual Reality                                   |
| NRCT      | Non-Randomized Clinical Trial                                   |
| OT        | Occupational Therapy                                            |
| PASS-BADL | Performance Assessment of Self-care Skills, Basic ADL           |
| PASS-IADL | Performance Assessment of Self-care Skills,<br>Instrumental ADL |
| QoL       | Quality of Life                                                 |
| RCT       | Randomized Controlled Trial                                     |
| RoB       | Risk of Bias                                                    |
| SD        | Standard Deviation                                              |
| SIS       | Stroke Impact Scale                                             |
| SGPALS    | Saltin-Grimby Physical Activity Level Scale                     |
| SUS       | System Usability Scale                                          |
| SWM       | Semmes-Weinstein monofilament                                   |
| TMS       | Transcranial Magnetic Stimulation                               |
| UE        | Upper Extremity                                                 |
| UMT       | Usual Mirror Therapy                                            |
| VR        | Virtual Reality                                                 |
| VRG       | Virtual Reality Group                                           |

---

**Table S1 – list of the acronyms used.**
